# Supplementary material for: Comprehensive Functional Analysis of N-Linked Glycans on Ebola Virus GP1
Source: PubMed Central journal article supplement — mBio. 2014 Jan 28;5(1):e00862-13. doi: 10.1128/mBio.00862-13 (PMC3950510; doi:10.1128/mbio.00862-13), 2014-01-28
Supplement: mbo001141708st1.pdf [file mbo001141708st1.pdf]

TABLE S1 Nomenclature of N-glycan site mutations in EBOV GP and GP1Δmuc

| Name              | Mutations                                                     | Mutation present in |         |
|-------------------|---------------------------------------------------------------|---------------------|---------|
|                   |                                                               | GP                  | GP1Δmuc |
| T42V              | T42V                                                          | +                   | +       |
| T206V             | T206V                                                         | +                   | +       |
| T230V             | T230V                                                         | -                   | +       |
| N238D             | N238D                                                         | +                   | +       |
| T259V             | T259V                                                         | -                   | +       |
| T270V             | T270V                                                         | -                   | +       |
| T298V             | T298V                                                         | -                   | +       |
| T230V/N238D       | T230V / N238D                                                 | +                   | +       |
| N238D/T259V       | N238D / T259V                                                 | -                   | +       |
| T230V/T259V       | T230V T259V                                                   | -                   | +       |
| N238D/T270V       | N238D T270V                                                   | +                   | +       |
| T42V/T206V        | T42V / T206V                                                  | +                   | -       |
| T206V/T230V       |                                                               | +                   | +       |
| T206V/T259V       | T259V                                                         | +                   | +       |
| T230V/N238D/T259V | T230V / N238D / T259V                                         | +                   | +       |
| T42V/T206V/T230V  | T42V / T206V / T230V                                          | +                   | -       |
| T42V/T206V/T259V  | T42V / T206V T259V                                            | +                   | +       |
| T206V/T230V/T259V | T230V T259V                                                   | +                   | +       |
| 4G                | T230V / N238D / T259V / T270V                                 | +                   | +       |
| 5G                | T230V / N238D / T259V / T270V / T298V                         | +                   | +       |
| 6G                | T206V / T230V / N238D / T259V / T270V / T298V                 | +                   | -       |
| 7G                | T42V / T206V / T230V / N238D / T259V / T270V / T298V          | +                   | -       |
| Name              | Mucin-like domain N-linked glycan site mutations              | Mutation present in |         |
|                   |                                                               | GP                  | 7G      |
| m1G               | T388V                                                         | -                   | +       |
| m2G               | T388V / S415A                                                 | -                   | +       |
| m3G               | S348A / T388V / S415A                                         | -                   | +       |
| m4G               | S348A / T388V / S415A / S438A                                 | -                   | +       |
| m5G               | T335V / S348A / T388V / S415A / S438A                         | -                   | +       |
| m6G               | T335V / S348A / T388V / S415A / S438A / S456                  | -                   | +       |
| m7G               | S319A / T335V / S348A / T388V / S415A / S438A / S456A         | -                   | +       |
| m8G               | S319A / T335V / S348A / T388V / S415A / S438A / S456A / T464V | +                   | +       |
