# Supplementary figures and images for: Comprehensive Functional Analysis of N-Linked Glycans on Ebola Virus GP1
Source: PubMed Central journal article supplement — mBio. 2014 Jan 28;5(1):e00862-13. doi: 10.1128/mBio.00862-13 (PMC3950510; doi:10.1128/mbio.00862-13), 2014-01-28

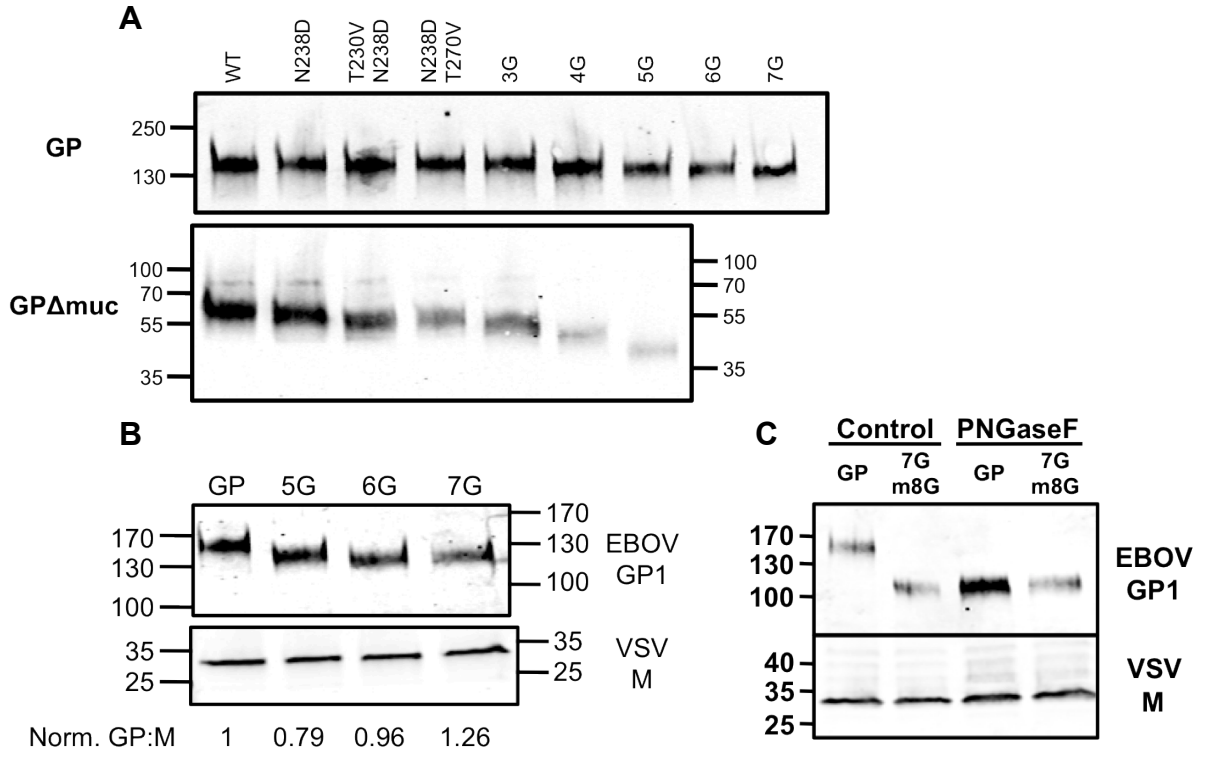

Supplement: mbo001141708sf01.pdf [file mbo001141708sf01.pdf]

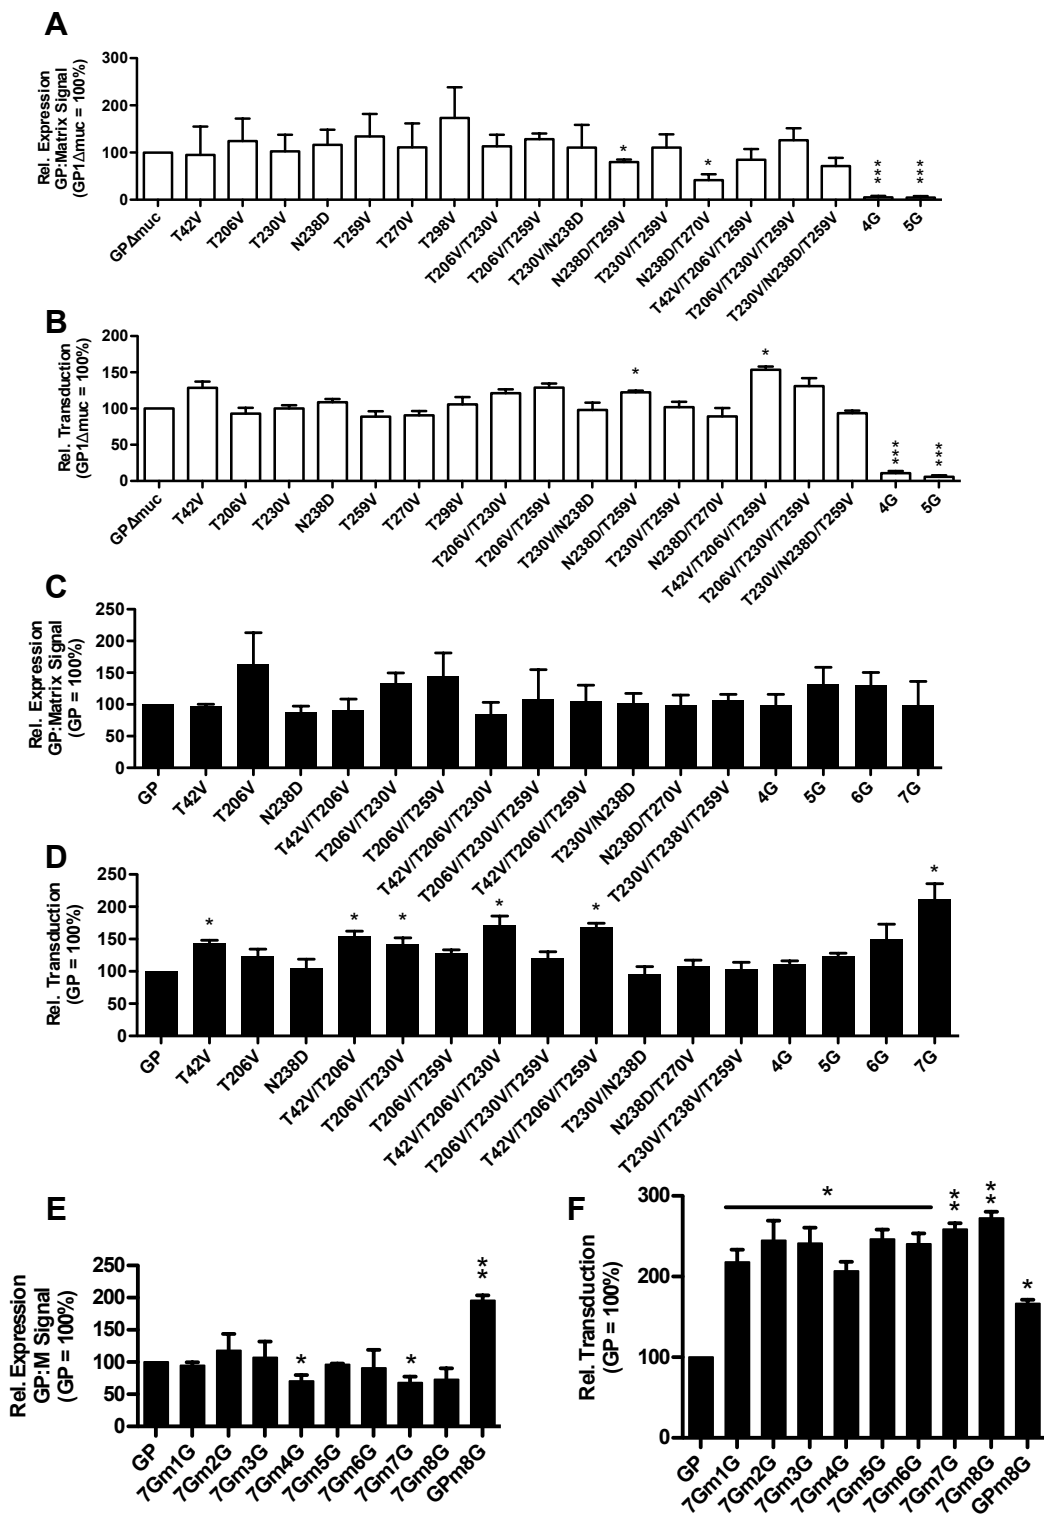

Supplement: mbo001141708sf02.pdf [file mbo001141708sf02.pdf]

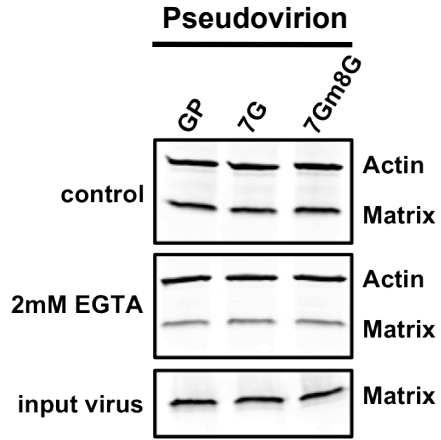

Supplement: mbo001141708sf03.pdf [file mbo001141708sf03.pdf]

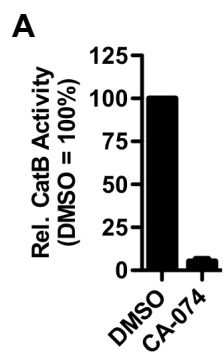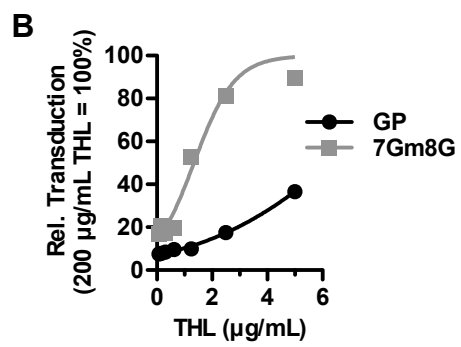

Supplement: mbo001141708sf04.pdf [file mbo001141708sf04.pdf]

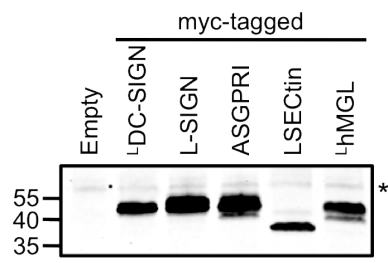

Supplement: mbo001141708sf05.pdf [file mbo001141708sf05.pdf]

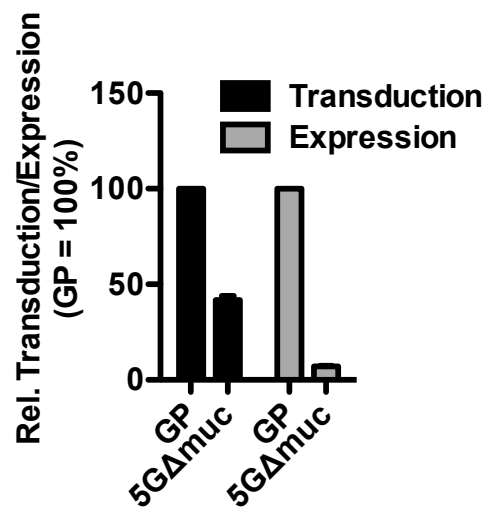

Supplement: mbo001141708sf06.pdf [file mbo001141708sf06.pdf]

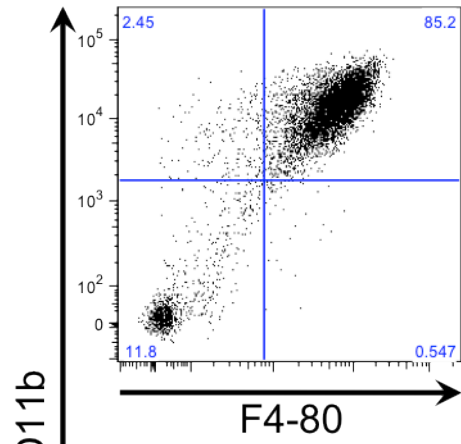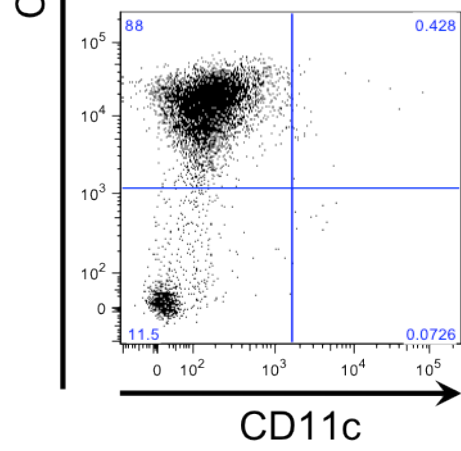

Supplement: mbo001141708sf07.pdf [file mbo001141708sf07.pdf]

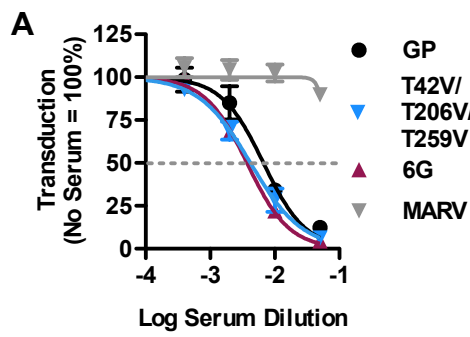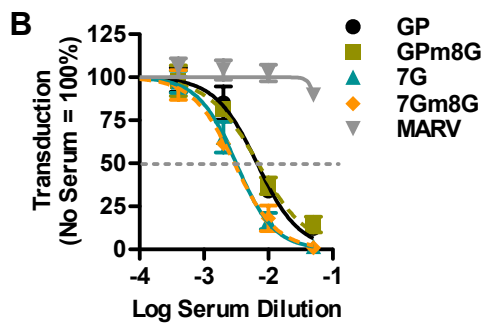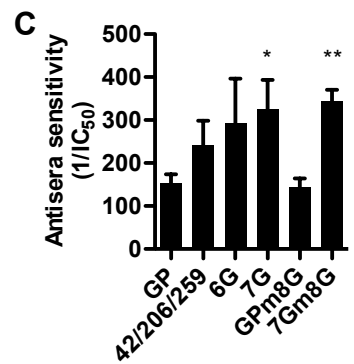

Supplement: mbo001141708sf08.pdf [file mbo001141708sf08.pdf]
